# Supplementary material for: Molecular Epidemiology of Enteroaggregative Escherichia coli (EAEC) Isolates of Hospitalized Children from Bolivia Reveal High Heterogeneity and Multidrug-Resistance
Source: PubMed Central journal article supplement (PMC7765457; doi:10.3390/ijms21249543), 2020-12-15
Supplement: ijms-21-09543-s001.pdf [file ijms-21-09543-s001.pdf]

## Supplementary Material

**Table S1.** Distribution of cases of EAEC and subtypes based on age groups among children less than 5 years of age with and without diarrhea.

| EAEC (no. of isolates) | Age groups (month) | Diarrheal cases |        | Non-diarrheal cases |        | OD ratio (95% CI)  | P-value |
|------------------------|--------------------|-----------------|--------|---------------------|--------|--------------------|---------|
|                        |                    | n               | (%)    | n                   | (%)    |                    |         |
| t-EAEC (186)           | < 6                | 36              | (19.3) | 6                   | (16.2) | 1.01 (0.40 - 2.34) | >0.9999 |
|                        | 7-12               | 76              | (40.9) | 16                  | (43.3) | 0.75 (0.41 - 1.38) | 0.4119  |
|                        | >12                | 74              | (39.8) | 15                  | (40.5) | 0.79 (0.42 - 1.5)  | 0.5063  |
| a-EAEC (254)           | < 6                | 40              | (15.8) | 3                   | (8.1)  | 2.36 (0.78 - 7.47) | 0.1774  |
|                        | 7-12               | 108             | (42.5) | 10                  | (27.0) | 2.08 (1.05 - 4.26) | 0.0369  |
|                        | >12                | 106             | (41.7) | 24                  | (64.9) | 0.66 (0.39 - 1.12) | 0.1488  |
| all EAEC (440)         | < 6                | 76              | (17.3) | 9                   | (12.2) | 1.48 (0.73 - 3.08) | 0.3947  |
|                        | 7-12               | 184             | (41.8) | 26                  | (35.1) | 1.33 (0.78 - 2.23) | 0.3080  |
|                        | >12                | 180             | (40.9) | 39                  | (52.7) | 0.62 (0.38 - 1.00) | 0.0748  |

**Table S2.** Distribution of EAEC cases according to the season and age groups. D = diarrheal cases; ND = non-diarrheal cases.

| Pathogen                   | Variable | Warm-humid* |        | Cold-dry |        | OD ratio (95% CI)         | <i>p</i> -value |
|----------------------------|----------|-------------|--------|----------|--------|---------------------------|-----------------|
|                            |          | n           | (%)    | n        | (%)    |                           |                 |
| EAEC                       | D (440)  | 216         | (49.1) | 224      | (50.9) | 0.6575 (0.3926 - 1.095)   | 0.1039          |
|                            | ND (74)  | 44          | (59.5) | 30       | (40.5) |                           |                 |
|                            | a-EAEC   | 130         | (51.2) | 124      | (48.8) | 1.219 (0.8398 - 1.776)    | 0.3346          |
|                            | t-EAEC   | 86          | (46.2) | 100      | (53.8) |                           |                 |
| <b>Age groups (months)</b> |          |             |        |          |        |                           |                 |
| a-EAEC (254)               | < 6      | 19          | (7.5)  | 21       | (8.3)  | 0.9323 (0.4958 - 1.830)   | 0.8695          |
|                            | 7-12     | 53          | (20.9) | 55       | (21.7) | 0.9991 (0.6484 - 1.557)   | >0.9999         |
|                            | >12      | 58          | (22.8) | 48       | (18.9) | 1.346 (0.8596 - 2.076)    | 0.2199          |
| t-EAEC (186)               | < 6      | 12          | (6.5)  | 24       | (12.9) | 0.4902 (0.2452 to 0.9791) | 0.056           |
|                            | 7-12     | 39          | (21.0) | 37       | (19.9) | 1.114 (0.6887 to 1.809)   | 0.7061          |
|                            | >12      | 35          | (18.8) | 39       | (21.0) | 0.9173 (0.5566 to 1.497)  | 0.7991          |

**Table S3. Prevalence of virulence genes combinations among EAEC isolates**

| Genotypes                             | Diarrheal isolates<br>(n=440) |     | Non-diarrheal isolates<br>(n=74) |     | Total |     |
|---------------------------------------|-------------------------------|-----|----------------------------------|-----|-------|-----|
|                                       | n                             | %   | n                                | %   | n     | %   |
| <i>aap irp pic</i>                    | 32                            | 7.3 | 2                                | 2.7 | 34    | 6.6 |
| <i>aap irp pic aggR</i>               | 27                            | 6.1 | 3                                | 4.1 | 30    | 5.8 |
| <i>aap irp pic astA</i>               | 25                            | 5.7 | 3                                | 4.1 | 28    | 5.4 |
| <i>aap irp</i>                        | 18                            | 4.1 | 5                                | 6.8 | 23    | 4.5 |
| <i>aap irp aggR</i>                   | 20                            | 4.5 | 1                                | 1.4 | 21    | 4.1 |
| <i>aap irp pic astA aggR</i>          | 17                            | 3.9 | 2                                | 2.7 | 19    | 3.7 |
| <i>aap</i>                            | 15                            | 3.4 | 3                                | 4.1 | 18    | 3.5 |
| <i>irp</i>                            | 13                            | 3.0 | 4                                | 5.4 | 17    | 3.3 |
| <i>aap irp pic astA aggR aafA pet</i> | 15                            | 3.4 | 1                                | 1.4 | 16    | 3.1 |
| <i>aap aggR</i>                       | 8                             | 1.8 | 5                                | 6.8 | 13    | 2.5 |
| <i>aap irp pic astA aggA</i>          | 11                            | 2.5 | 1                                | 1.4 | 12    | 2.3 |
| <i>aap irp astA aggR aggA</i>         | 9                             | 2.0 | 2                                | 2.7 | 11    | 2.1 |
| <i>aap irp astA</i>                   | 10                            | 2.3 | 1                                | 1.4 | 11    | 2.1 |

Supplementary Material

|                                   |        |       |        |
|-----------------------------------|--------|-------|--------|
| <i>aap irp pic astA aafA pet</i>  | 9 2.0  | 1 1.4 | 10 1.9 |
| <i>aap irp pic astA aggR aafA</i> | 9 2.0  | 1 1.4 | 10 1.9 |
| <i>aap irp pic astA aggR aggA</i> | 10 2.3 | 0 0.0 | 10 1.9 |
| <i>pic</i>                        | 3 0.7  | 6 8.1 | 9 1.7  |
| <i>aap irp astA aggA</i>          | 7 1.6  | 2 2.7 | 9 1.7  |
| <i>aap irp pic astA aggR pet</i>  | 6 1.4  | 2 2.7 | 8 1.6  |
| <i>aap pic</i>                    | 6 1.4  | 2 2.7 | 8 1.6  |
| <i>aap irp pic astA pet</i>       | 7 1.6  | 1 1.4 | 8 1.6  |
| <i>aap irp pic aggA</i>           | 8 1.8  | 0 0.0 | 8 1.6  |
| <i>aap irp astA aggR</i>          | 5 1.1  | 2 2.7 | 7 1.4  |
| <i>irp pic</i>                    | 5 1.1  | 2 2.7 | 7 1.4  |
| <i>aap irp aggA</i>               | 7 1.6  | 0 0.0 | 7 1.4  |
| <i>aap irp pic pet</i>            | 7 1.6  | 0 0.0 | 7 1.4  |
| <i>irp pic astA</i>               | 5 1.1  | 1 1.4 | 6 1.2  |
| <i>aap pic aggR</i>               | 3 0.7  | 2 2.7 | 5 1.0  |
| <i>aap pic astA</i>               | 4 0.9  | 1 1.4 | 5 1.0  |
| <i>aap pic astA aggR</i>          | 4 0.9  | 1 1.4 | 5 1.0  |
| <i>irp pic aggR</i>               | 4 0.9  | 1 1.4 | 5 1.0  |
| <i>aap irp aafA</i>               | 5 1.1  | 0 0.0 | 5 1.0  |
| <i>aap irp aggR aggA</i>          | 5 1.1  | 0 0.0 | 5 1.0  |

|                                   |   |     |   |     |   |     |
|-----------------------------------|---|-----|---|-----|---|-----|
| <i>irp astA</i>                   | 5 | 1.1 | 0 | 0.0 | 5 | 1.0 |
| <i>aap irp pic aggR aggA</i>      | 4 | 0.9 | 0 | 0.0 | 4 | 0.8 |
| <i>aap irp pic aggR pet</i>       | 4 | 0.9 | 0 | 0.0 | 4 | 0.8 |
| <i>irp aggR</i>                   | 4 | 0.9 | 0 | 0.0 | 4 | 0.8 |
| <i>aap astA aggR</i>              | 1 | 0.2 | 2 | 2.7 | 3 | 0.6 |
| <i>aap pic aggR aggA</i>          | 1 | 0.2 | 2 | 2.7 | 3 | 0.6 |
| <i>aap aggR aggA</i>              | 3 | 0.7 | 0 | 0.0 | 3 | 0.6 |
| <i>aap astA</i>                   | 3 | 0.7 | 0 | 0.0 | 3 | 0.6 |
| <i>aap irp pic astA aafA</i>      | 3 | 0.7 | 0 | 0.0 | 3 | 0.6 |
| <i>irp astA aggA</i>              | 3 | 0.7 | 0 | 0.0 | 3 | 0.6 |
| <i>irp pic astA aggR</i>          | 3 | 0.7 | 0 | 0.0 | 3 | 0.6 |
| <i>irp pic astA aggR aafA</i>     | 3 | 0.7 | 0 | 0.0 | 3 | 0.6 |
| <i>irp pic astA aggR aafA pet</i> | 3 | 0.7 | 0 | 0.0 | 3 | 0.6 |
| <i>aap aggA</i>                   | 1 | 0.2 | 1 | 1.4 | 2 | 0.4 |
| <i>irp astA aggR</i>              | 1 | 0.2 | 1 | 1.4 | 2 | 0.4 |
| <i>pic aggR</i>                   | 1 | 0.2 | 1 | 1.4 | 2 | 0.4 |
| <i>aap aafA</i>                   | 2 | 0.5 | 0 | 0.0 | 2 | 0.4 |
| <i>aap astA aafA pet</i>          | 2 | 0.5 | 0 | 0.0 | 2 | 0.4 |
| <i>aap irp aggR aafA</i>          | 2 | 0.5 | 0 | 0.0 | 2 | 0.4 |
| <i>aap irp astA aggR aafA pet</i> | 2 | 0.5 | 0 | 0.0 | 2 | 0.4 |
| <i>aap irp pic aggR aafA pet</i>  | 2 | 0.5 | 0 | 0.0 | 2 | 0.4 |

Supplementary Material

|                                            |       |       |       |
|--------------------------------------------|-------|-------|-------|
| <i>aap irp pic astA aafA aggA pet</i>      | 2 0.5 | 0 0.0 | 2 0.4 |
| <i>aap pic aggA</i>                        | 2 0.5 | 0 0.0 | 2 0.4 |
| <i>astA aggA</i>                           | 2 0.5 | 0 0.0 | 2 0.4 |
| <i>irp astA aafA</i>                       | 2 0.5 | 0 0.0 | 2 0.4 |
| <i>irp pet</i>                             | 2 0.5 | 0 0.0 | 2 0.4 |
| <i>irp pic astA aggR aggA</i>              | 2 0.5 | 0 0.0 | 2 0.4 |
| <i>aap pic astA aggR</i>                   | 0 0.0 | 1 1.4 | 1 0.2 |
| <i>aap irp astA aggR aafA</i>              | 0 0.0 | 1 1.4 | 1 0.2 |
| <i>aap irp aggR pet</i>                    | 0 0.0 | 1 1.4 | 1 0.2 |
| <i>aap irp pic astA aggR aafA aggA</i>     | 0 0.0 | 1 1.4 | 1 0.2 |
| <i>aap irp pic astA aggR aafA aggA pet</i> | 0 0.0 | 1 1.4 | 1 0.2 |
| <i>aap irp pic astA aggR aggA pet</i>      | 0 0.0 | 1 1.4 | 1 0.2 |
| <i>irp pic astA aggR pet</i>               | 0 0.0 | 1 1.4 | 1 0.2 |
| <i>pic irp aggR</i>                        | 0 0.0 | 1 1.4 | 1 0.2 |
| <i>aafA</i>                                | 1 0.2 | 0 0.0 | 1 0.2 |
| <i>aap aggR aafA pet</i>                   | 1 0.2 | 0 0.0 | 1 0.2 |
| <i>aap astA aafA</i>                       | 1 0.2 | 0 0.0 | 1 0.2 |
| <i>aap astA aggA</i>                       | 1 0.2 | 0 0.0 | 1 0.2 |
| <i>aap irp astA aggR</i>                   | 1 0.2 | 0 0.0 | 1 0.2 |
| <i>aap irp astA aggR aafA aggA pet</i>     | 1 0.2 | 0 0.0 | 1 0.2 |

|                                    |        |       |        |
|------------------------------------|--------|-------|--------|
| <i>aap irp aafA aggA</i>           | 1 0.2  | 0 0.0 | 1 0.2  |
| <i>aap irp aggR aafA pet</i>       | 1 0.2  | 0 0.0 | 1 0.2  |
| <i>aap irp astA aggR aafA aggA</i> | 1 0.2  | 0 0.0 | 1 0.2  |
| <i>aap irp pic aafA</i>            | 1 0.2  | 0 0.0 | 1 0.2  |
| <i>aap irp pic aafA pet</i>        | 1 0.2  | 0 0.0 | 1 0.2  |
| <i>aap pic aafA</i>                | 1 0.2  | 0 0.0 | 1 0.2  |
| <i>aap pic aggR aggA pet</i>       | 1 0.2  | 0 0.0 | 1 0.2  |
| <i>aggR</i>                        | 1 0.2  | 0 0.0 | 1 0.2  |
| <i>astA</i>                        | 1 0.2  | 0 0.0 | 1 0.2  |
| <i>irp aafA</i>                    | 1 0.2  | 0 0.0 | 1 0.2  |
| <i>irp astA aggR aggA</i>          | 1 0.2  | 0 0.0 | 1 0.2  |
| <i>irp pic aggA</i>                | 1 0.2  | 0 0.0 | 1 0.2  |
| <i>irp pic astA aafA</i>           | 1 0.2  | 0 0.0 | 1 0.2  |
| <i>irp pic astA pet</i>            | 1 0.2  | 0 0.0 | 1 0.2  |
| <i>irp pic pet</i>                 | 1 0.2  | 0 0.0 | 1 0.2  |
| <i>pic aggA</i>                    | 1 0.2  | 0 0.0 | 1 0.2  |
| Negative                           | 14 3.2 | 1 1.4 | 15 3.1 |

---

**Table S4.** Primers used in this study.

| Multiplex | Target Gene                    | Primer Sequence (5' to 3')                              | Amplicon Size (bp) | Ref. |
|-----------|--------------------------------|---------------------------------------------------------|--------------------|------|
|           | <i>aatA</i> ( <i>pCVD432</i> ) | F: CTGGCGAAAGACTGTATCAT<br>R: CAATGTATAGAAATCCGCTGTT    | 630                | [1]  |
|           | <i>aggR</i>                    | F: CGT TCG TGA ATG CAA AG<br>R: GAG GCA TCA CCA ATA TG  | 308                | [2]  |
|           | <i>astA</i>                    | F: CCATCAACACAGTATATCCGA<br>R: GGTCGCGAGTGACGGCTTTGT    | 111                | [1]  |
| I-EAEC    | <i>pic</i>                     | F: TTCAGCGGAAAGACGAA<br>R: TCTGCGCATTTCATACCA           | 517                | [3]  |
|           | <i>irp2</i>                    | F: AAGGTTTCGCTGTTACCGGAC<br>R: TCGTCGGGCAGCGTTTCTTCT    | 267                | [4]  |
|           | <i>aggA</i>                    | F: GCTAACGCTGCGTTAGAAAGACC<br>R: GGAGTATCATTCTATATTCGCC | 421                | [3]  |
|           | <i>aafA</i>                    | F: GACAACCGCAACGCTGCGCTG<br>R: GATAGCCGGTGTAATTGAGCC    | 233                | [3]  |
| II-EAEC   | <i>pet</i>                     | F: TCATTTCCAGCACTTCCTGT<br>R: CTCCGACAGTATTGCTCGT       | 442                | [5]  |
|           | <i>aap</i>                     | F: CTTTTCTGGCATCTTGGGT<br>R: GTAACAACCCCTTTGGAAGT       | 232                | [1]  |



## References

1. Kahali, S.; Sarkar, B.; Rajendran, K.; Khanam, J.; Yamasaki, S.; Nandy, R.K.; Bhattacharya, S.K.; Ramamurthy, T. Virulence characteristics and molecular epidemiology of enteroaggregative *Escherichia coli* isolates from hospitalized diarrheal patients in Kolkata, India. *J. Clin. Microbiol.* **2004**, *42*, 4111-4120, doi:10.1128/JCM.42.9.4111-4120.2004.
2. Nataro, J.P.; Yikang, D.; Yingkang, D.; Walker, K. AggR, a transcriptional activator of aggregative adherence fimbria I expression in enteroaggregative *Escherichia coli*. *J. Bacteriol.* **1994**, *176*, 4691-4699, doi:10.1128/jb.176.15.4691-4699.1994.
3. Piva, I.C.; Pereira, A.L.; Ferraz, L.R.; Silva, R.S.N.; Vieira, A.C.; Blanco, J.E.; Blanco, M.; Blanco, J.; Giugliano, L.G. Virulence markers of enteroaggregative *Escherichia coli* isolated from children and adults with diarrhea in Brasília, Brazil. *J. Clin. Microbiol.* **2003**, *41*, 1827-1832, doi:10.1128/jcm.41.5.1827-1832.2003.
4. Schubert, S.; Rakin, A.; Karch, H.; Carniel, E.; Heesemann, J. Prevalence of the "high-pathogenicity island" of *Yersinia* species among *Escherichia coli* strains that are pathogenic to humans. *Infection and immunity* **1998**, *66*, 480-485, doi:10.1128/IAI.66.2.480-485.1998.
5. Yatsuyanagi, J.; Saito, S.; Sato, H.; Miyajima, Y.; Amano, K.; Enomoto, K. Characterization of enteropathogenic and enteroaggregative *Escherichia coli* isolated from diarrheal outbreaks. *J Clin Microbiol* **2002**, *40*, 294-297, doi:10.1128/jcm.40.1.294-297.2002.
